# Supplementary material for: Complexity and variability analyses of motor activity distinguish mood states in bipolar disorder
Source: PubMed Central journal article supplement (PMC8782466; doi:10.1371/journal.pone.0262232), 2022-01-21

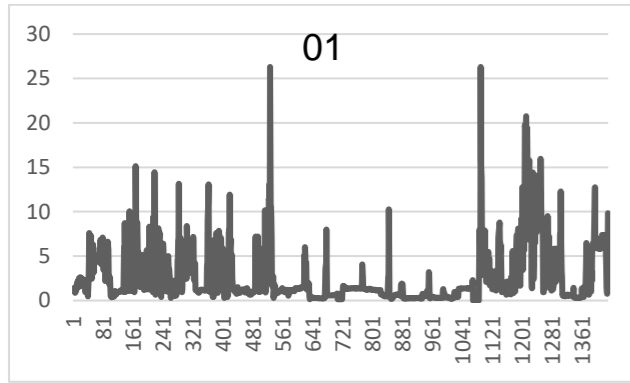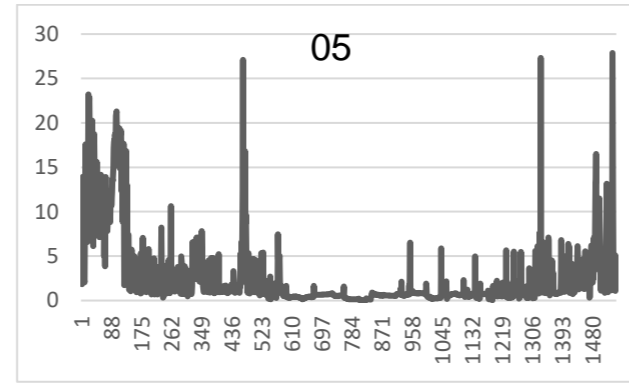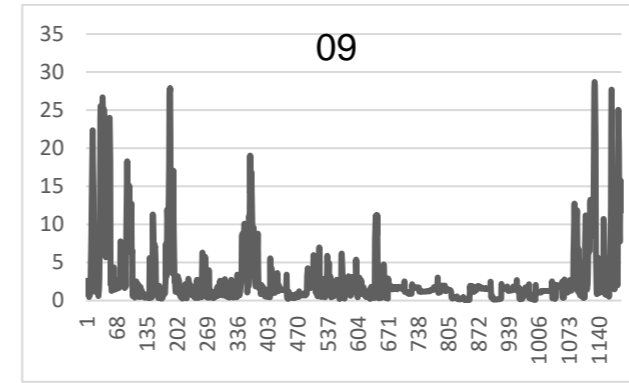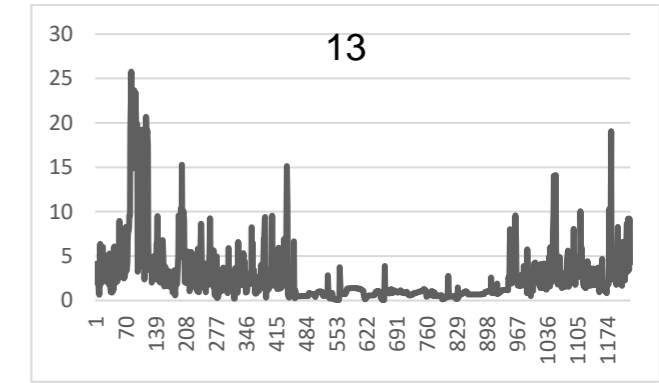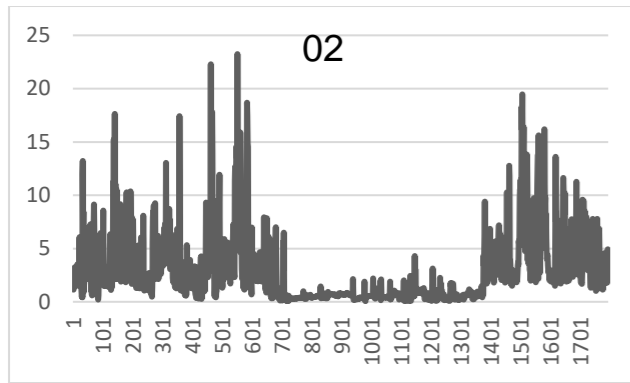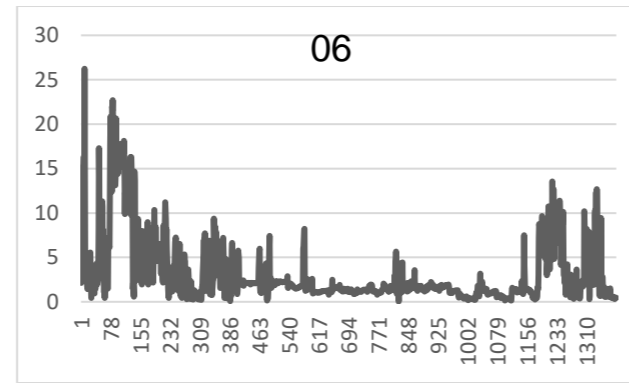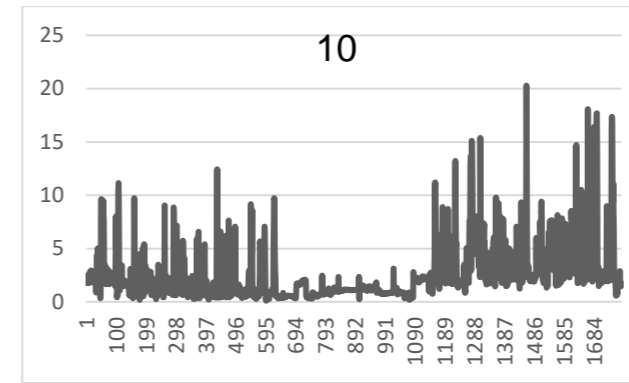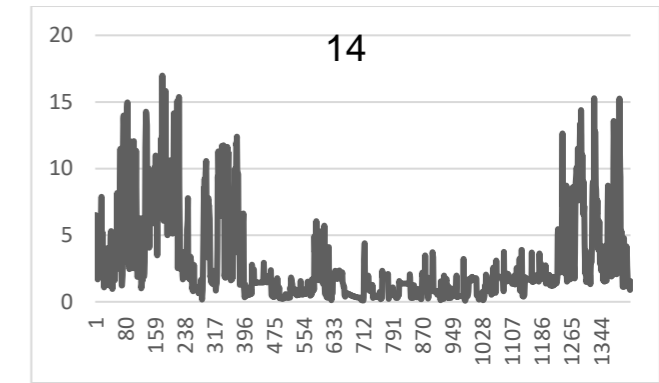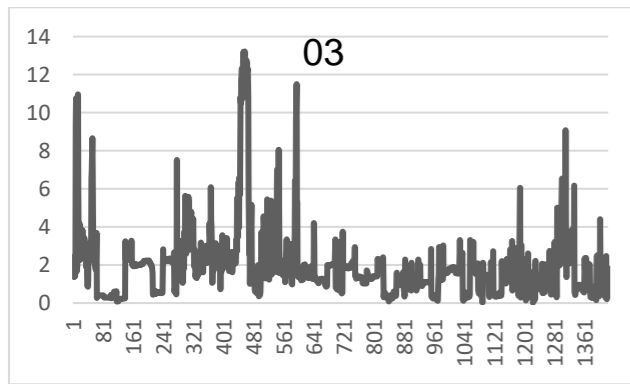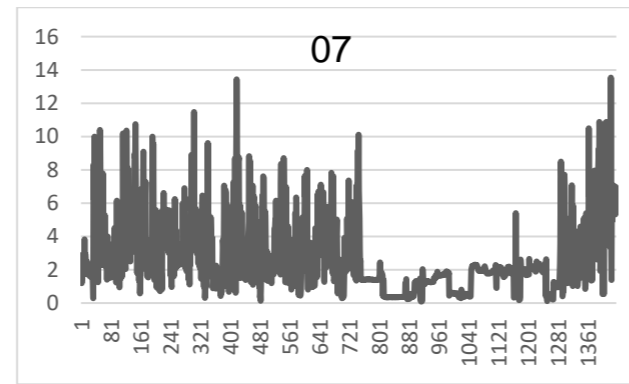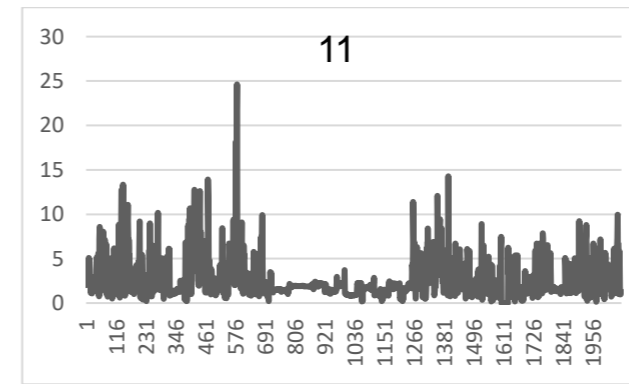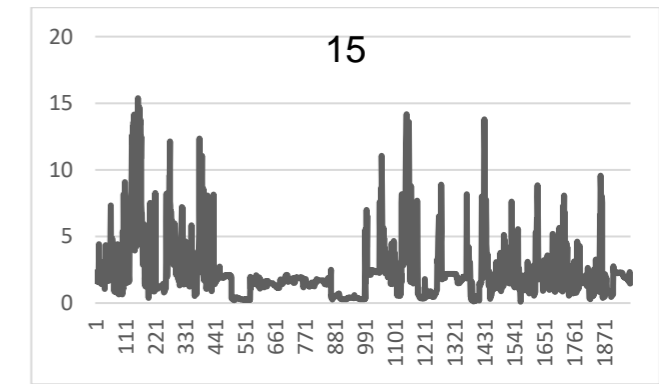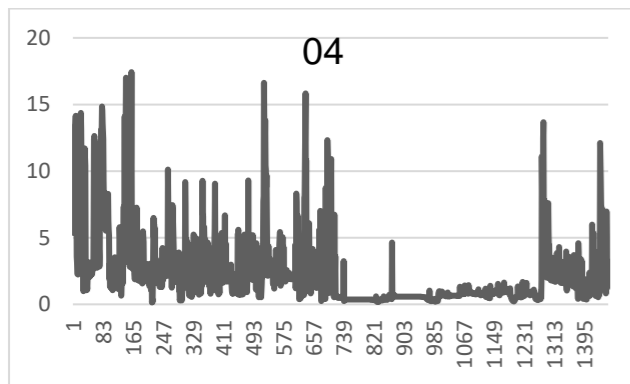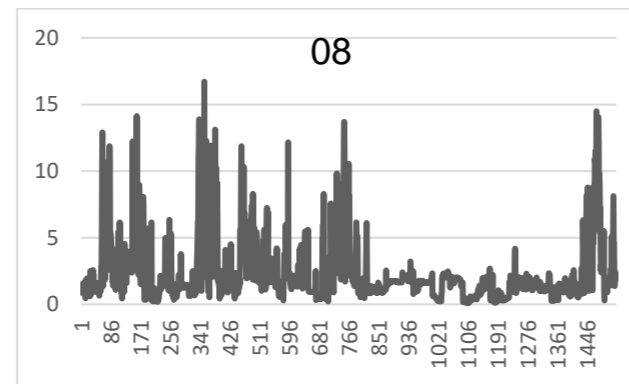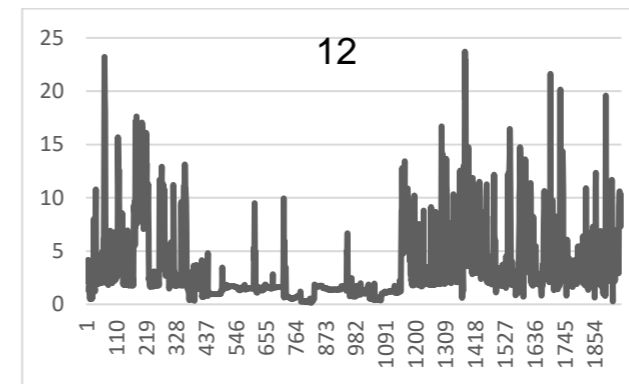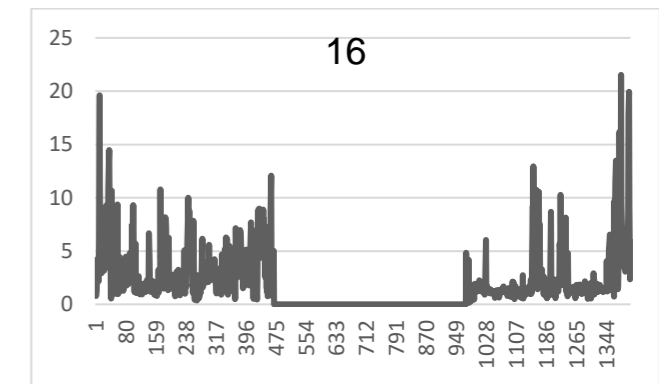

Supplement: pone.0262232.s002.pdf [file pone.0262232.s002.pdf]
